# Supplementary material
Source: PubMed Central journal article supplement (PMC2573026)
Supplement: NIHMS72859-supplement-01.pdf [file NIHMS72859-supplement-01.pdf]

**Supplementary Information (SI)** for “Signal discrimination by differential regulation of protein stability in quorum sensing”

Cameron Smith, Hao Song, and Lingchong You

**1. Derivation of the analytical expression of steady-state fidelity  $f$  (Eq. 5) from the quorum-sensing model (Ordinary Differential Equations 1-3 from the main text) using *Mathematica*<sup>®</sup>**

Please see the file “derivation\_of\_f.nb”.

**2. Instability of LuxR alone does not endow bistability in the LuxR-positive feedback loop mediated by the quorum sensing signaling molecule**

Recent analysis by Buchler et al. illustrated that nonlinear protein degradation coupled with a positive feedback loop (PFL) may enlarge the parameter regime wherein bistability occurs (1). It remains unclear whether the bistable region can be enhanced by the much higher instability of the LuxR-type monomer, as compared to its dimer, in a quorum-sensing mediated PFL. To address this issue, we use bifurcation theory to model a PFL mediated by quorum sensing (see Figure S5A). A dimensionless model of this system is as follows:

$$\frac{dR}{d\tau} = a_R \frac{R^{*n}}{1 + R^{*n}} - b_R R - a_b AR + a_{R0} \quad (1)$$

$$\frac{dR^*}{d\tau} = a_b AR - R^* \quad (2)$$

where  $R$ ,  $R^*$  and  $A$  represent the dimensionless concentrations of the transcription factor  $R$ , activated complex  $R^*$ , and the signal  $A$ , respectively.  $a_R$  is the synthetic rate constant of  $R$ .  $a_{R0}$  is the basal synthetic rate constant of  $R$ .  $b_R$  is the degradation rate constant of  $R$ . Note that  $R$  is much less stable than  $R^*$  (i.e,  $b_R \gg 1$ ).  $a_b$  is the binding rate constant of  $R$  with  $A$ . Considering physiologically feasible scenarios, the base values are chosen as  $a_b=1$ ,  $a_R = 1$ ,  $a_{R0} = 1$ ,  $b_R=5$ .

In the model, translation of *luxR* mRNA is not explicitly described, and is lumped into a single synthesis process of the  $R$ -protein. Dimerization of  $R^*$  is assumed to be fast. The synthetic rate expression of  $R$  is a Hill function with coefficient  $n$  ( $n \geq 1$ ) to represent that  $R^*$  forms a homodimer prior to binding to the *lux* promoter and inducing the expression of *luxR*.

Under the approximation of quasi-steady-state, Equations (1) and (2) can be reduced to a nonlinear algebraic equation:

$$f(R, A; b_R, a_R, a_{R0}, a_b) = a_R \cdot \frac{(a_b A)^2 R^2}{1 + (a_b A)^2 R^2} - b_R R - a_b AR + a_{R0} = 0 \quad (3)$$

We aim to determine the region of the parameter space  $\underline{\mathbf{P}}^* = (a_R, b_R)$  where a bistable response (“ $R$  versus  $A$ ” curve) can occur. According to bifurcation theory (2), the loci of Hysteresis separate the parameter space into regions, each corresponding to monotonic or bistable responses. We obtain the analytical expression of the loci of Hysteresis as Equation (4):

$$a_R = \frac{4n}{(n-1)^2} a_{R0} \quad (4)$$

This expression indicates two essential features of this PFL. First, bistability cannot be generated with cooperativity ( $n = 1$ ). Second, in the  $(a_R, b_R)$ -plane the bistable region (with cooperativity,  $n > 1$ ) is above a critical value of  $a_R$  and independent of the value of  $b_R$  (Figure S5B). If the LuxR synthesis rate is lower than this critical value, no matter how one increases the  $b_R$  value (*i.e.*, the decay rate or instability of the LuxR monomer), bistability cannot occur.

### 3. Increasing LuxR decay rate can endow bistability in a LuxR-LuxI-double positive feedback loop

If the R-protein and the signal  $A$  are both regulated in their synthesis by PFLs (Figure S5C), the instability of the  $R$ -protein will impact the ability of the system to generate bistability. A dimensionless model that describes this network architecture is as follows:

$$\frac{dR}{d\tau} = a_R \frac{R^{*n}}{1 + R^{*n}} - b_R R - a_b AR + a_{R0} \quad (5)$$

$$\frac{dA}{d\tau} = a_A \frac{R^{*n}}{1 + R^{*n}} - b_A A - a_b AR + a_{A0} \quad (6)$$

$$\frac{dR^*}{d\tau} = a_b AR - R^* \quad (7)$$

where the notation is identical to that in Equations (1) and (2). In addition,  $a_A$  is the synthetic rate constant of the signal  $A$ .  $a_{A0}$  is the basal synthesis rate constant of  $A$ .  $b_A$  is the degradation rate constant of  $A$ . Here we consider the case that  $R^*$  does not cooperatively bind to the promoter, *i.e.*, the Hill coefficient  $n = 1$ .

The complexity of this nonlinear system prevents an analytic expression of the loci of Hysteresis. We therefore use numerical analysis employing the XPPAUT software. Biologically feasible parameter values are used:  $a_b=0.5$ ,  $a_R=1$ ,  $a_{R0}=0.2$ ,  $a_A=6$ ,  $a_{A0}=0.2$ ,  $b_R=2$ , and  $b_A=1$ .

Bifurcation analysis, as illustrated in Figure S5D, shows that increasing the decay rate constant of the *R*-protein ( $b_R$ ) can give rise to bistability.

#### 4. Detailed explanation for content in Table 1

**LuxR** – Urbanowski et al (3) claim that LuxR requires its cognate signaling molecule (3OC6HSL) for active LuxR to be obtained. In particular, 3OC6HSL is required in the nascent stage of the LuxR polypeptide synthesis in order for it to fold into its stable tertiary conformation. Figure 2 from Collins, 2006 indicates that, of those tested, LuxR responds only minimally to signals other than its cognate signal (4).

**LuxR G2A-H** – Using directed evolution, Collins et al (2005) (5) and Collins et al (2006) (4) illustrate the plasticity of the binding affinity of LuxR, in terms of the ability to tune this binding affinity towards promiscuity, away from specificity to its cognate signal, and subsequently back towards specificity to an AHL molecule other than its cognate signal. Collins et al, 2006 also indicates that the presence of 3OC6HSL results in significant accumulation of LuxR and LuxR-G2E and the presence of C10HSL results in significant accumulation of LuxR-G2E and LuxR-G2E-R67M, whereas none of these proteins accumulates to a significant concentration in the absence of both signals. These results suggest that the AHL molecules serve as “folding switches” that result in significant stabilization of the LuxR-type proteins to which they bind.

**TraR** – Zhu and Winans (1999) shows that soluble TraR is not observed in the absence of its cognate signal (3OC8HSL)(6). Further analysis indicates that the half life of TraR increases from 3.5 minutes without the cognate signal to ~92 minutes (~30fold) with the signal present (7).

**LasR** – LasR was found to be nonfunctional when expressed in the absence of its cognate signal (3OC12HSL) (8). LasR is shown to bind the signal so tightly that it cannot be removed even following prolonged dialysis. Also, Bottomley et al, 2007 shows that LasR is only soluble in the presence of its cognate signal (9).

**SdiA** – Michael et al (2001) shows that SdiA responds to multiple AHL signals with different structures (10). Yao et al (2006) also shows that multiple AHL signals serve as “folding switches” for SdiA. However, in contrast to TraR, Yao et al (2006) shows that SdiA in inclusion bodies could be refolded upon the addition of C8HSL (11). This result indicates that the signals that bind to SdiA need not be present during the SdiA synthesis in order to bind to and induce folding in SdiA.

**CepR** – Weingart et al (2005) shows that CepR, similar to TraR, requires its cognate AHL to accumulate in the soluble fraction of cell lysate (12).

**RhlR** –Ventre et al (2003) shows that RhlR exists as a dimer in the absence of any AHL molecule. The addition of C4HSL, the cognate signal for RhlR, does not result in a change in the oligomerization state of RhlR (13) but rather switches its activity from repression to activation (14). The exposure of RhlR to the LasR cognate signal (3OC12HSL) results in the decoupling of the RhlR dimer into its monomeric subunits (13).

**ExpR** – It has been shown that ExpR serves as an activator of pectic enzyme expression (15, 16). Without its cognate AHL, ExpR forms a dimer and can repress its own expression. With its signal, however, the repression is relieved and ExpR activates the expression of target genes.

**CarR** – When expressed in *E. coli* in the absence of AHL, ~20% CarR is found in the soluble fraction. The fraction of CarR in the insoluble fraction can be refolded in the absence of its cognate AHL signal (17). CarR tends to multimerize in the absence of its cognate AHL. It can activate its target function independent of its cognate AHL upon even slight overexpression (18). CarR has been found to bind to multiple AHL signals as shown in Welch et al (2007).

## References

1. Buchler, N. E., Gerland, U., & Hwa, T. (2005) *Proceedings of the National Academy of Sciences of the United States of America* 1026, 9559-9564.
2. Golubitsky, M. (1988) *Singularities and groups in bifurcation theory* (Springer New York).
3. Urbanowski, M. L., Lostroh, C. P., & Greenberg, E. P. (2004) *J. Bacteriol.* 186, 631-637.
4. Collins, C. H., Leadbetter, J. R., & Arnold, F. H. (2006) *Nat Biotech* 24, 708-712.
5. Collins, C. H., Arnold, F. H., & Leadbetter, J. R. (2005) *Molecular Microbiology* 55, 712-723.
6. Zhu, J. & Winans, S. C. (1999) *Proceedings of the National Academy of Sciences of the United States of America* 96, 4832-4837.
7. Zhu, J. & Winans, S. C. (2001) *Proceedings of the National Academy of Sciences of the United States of America* 98, 1507-1512
8. Schuster, M., Urbanowski, M. L., & Greenberg, E. P. (2004) *Proceedings of the National Academy of Sciences of the United States of America* 101, 15833-15839
9. Bottomley, M. J., Muraglia, E., Bazzo, R., & Carfi, A. (2007) *Journal of Biological Chemistry* 282, 13592-13600.
10. Michael, B., Smith, J. N., Swift, S., Heffron, F., & Ahmer, B. M. (2001) *Journal of Bacteriology* 183, 5733-5742.
11. Yao, Y., Martinez-Yamout, M. A., Dickerson, T. J., Brogan, A. P., Wright, P. E., & Dyson, H. J. (2006) *J Mol Biol* 355, 262-273.
12. Weingart, C. L., White, C. E., Liu, S., Chai, Y., Cho, H., Tsai, C.-S., Wei, Y., Delay, N. R., Gronquist, M. R., Eberhard, A., *et al.* (2005) *Molecular Microbiology* 57, 452-467.
13. Ventre, I., Ledgham, F., Prima, V. r., Lazdunski, A. e., Foglino, M., & Sturgis, J. N. (2003) *Molecular Microbiology* 48, 187-198.
14. Medina, G., Juarez, K., Valderrama, B., & Soberon-Chavez, G. (2003) *Journal of Bacteriology* 185, 5976-5983
15. Castang, S., Reverchon, S., Gouet, P., & Nasser, W. (2006) *Journal of Biological Chemistry* 281, 29972-29987.
16. Reverchon, S., Bouillant, M. L., Salmond, G., & Nasser, W. (1998) *Molecular Microbiology* 29, 1407-1418.
17. Welch, M., Todd, D. E., Whitehead, N. A., McGowan, S. J., Bycroft, B. W., & Salmond, G. P. (2000) *EMBO* 19, 631-641.
18. McGowan, S., Sebahia, M., Jones, S., Yu, B., Bainton, N., Chan, P. F., Bycroft, B., Stewart, G. S., Williams, P., & Salmond, G. P. (1995) *Microbiology* 141, 541-550.
19. Basu, S., Gerchman, Y., Collins, C. H., Arnold, F. H., & Weiss, R. (2005) *Nature* 434, 1130-1134.
20. Prescott, L. M., Harley, J. P., & Klein, D. A. (2004) *Microbiology* (McGraw-Hill Science/Engineering/Math).

**Table S1: Base Parameter Set**

| Reaction                                                     | Definition                                               | Parameter | Base value*                              | Justification                                                                                                                 |
|--------------------------------------------------------------|----------------------------------------------------------|-----------|------------------------------------------|-------------------------------------------------------------------------------------------------------------------------------|
| $* \xrightarrow{k_R} R$                                      | Monomer synthesis                                        | $k_R$     | 19.3 nM/min                              | Provides a saturating level of monomer                                                                                        |
| $R \xrightarrow{d_R} *$                                      | Monomer degradation                                      | $d_R$     | $0.2 \text{ min}^{-1}$                   | Set to the half-life of TraR (~3.5 mins) (7)                                                                                  |
| $R + A_i \xrightarrow{k_1} R_i$                              | Binding of cognate signal to monomer                     | $k_1$     | $0.096(\text{nM} \cdot \text{min})^{-1}$ | Based on $K_D \approx 10\text{nM}$ (7)                                                                                        |
| $R_i \xrightarrow{k_{1r}} R + A_i$                           | Unbinding of cognate signal from monomer                 | $k_{1r}$  | $1 \text{ min}^{-1}$                     | Based on $K_D \approx 10\text{nM}$ (7)                                                                                        |
| $2R_i \xrightarrow{k_2} D_i$                                 | Dimerization of cognate signal-monomer complex           | $k_2$     | $0.096(\text{nM} \cdot \text{min})^{-1}$ | Based on $K_D \approx 10\text{nM}$ (7)                                                                                        |
| $D_i \xrightarrow{k_{2r}} 2R_i$                              | Dissociation of dimer                                    | $k_{2r}$  | $1 \text{ min}^{-1}$                     | Based on $K_D \approx 10\text{nM}$ (7)                                                                                        |
| $R_i \xrightarrow{d_{R1}} *$<br>$D_i \xrightarrow{d_{R1}} *$ | Complex and Dimer degradation                            | $d_{R1}$  | $0.023 \text{ min}^{-1}$                 | The measured dimer half-life is 92 mins (7). The given value takes into account dilution rate as the limiting factor (19).    |
|                                                              | AHL signal concentration                                 | $A_i$     |                                          | Set to mimic the half-max induction concentration ( $f_a$ ) or to provide a saturating concentration ( $f_s$ ) of AHL signals |
|                                                              | Modulation of non-cognate signal degradation rate        | $\alpha$  | 1                                        | Initially set to one to ensure symmetry                                                                                       |
|                                                              | Modulation of non-cognate signal dimer degradation rate  | $\beta$   | 1                                        | Initially set to one to ensure symmetry                                                                                       |
|                                                              | Modulation of non-cognate signal decoupling from monomer | $\gamma$  | 1                                        | Initially set to one to ensure symmetry                                                                                       |

\*All values are based on a conversion of  $9.64(10)^8 \text{ m/M} \approx 1 \text{ m/nM}$ , which implicitly assumes a mean cellular volume of  $1.6(10)^{-15} \text{ L/cell}$  (20).

## SI Figure Legend

**Figure S1:** Differential protein stabilization increases fidelity.

(A) The plot of  $f_a$  versus  $\alpha$  where  $\alpha_1=\alpha_2=\alpha$  and  $\beta=\gamma=1,10, \text{ and } 50$  demonstrates that, under otherwise symmetric parametric conditions, protein degradation plays a role in modulating the fidelity of the signal discrimination process based on the model analyzed herein. The parameter  $\alpha$  is being modulated within the predefined range:  $d_{R1} / d_R \leq \alpha \leq 1$ . Less sensitivity of  $f_a$  to  $\alpha$  is observed as  $\beta$  and  $\gamma$  increase.

(B) Equivalent to A, but for  $f_s$ .

**Figure S2:** Equivalent to figure 3A, but for  $f_s$ .

**Figure S3:** The minimal and maximal limits of fidelity in signal discrimination are also affected by the kinetic parameters that differentiate the signal binding and dimerization steps between the two pathways of Figure 1 ( $\beta$  and  $\gamma$  respectively). For  $f_a$ ,  $\beta$  and  $\gamma$  set the baseline for the fidelity in terms of the monomer degradation rate,  $d_R$ . As  $d_R$  increases, for each value of  $\beta$  and  $\gamma$ , the dynamic range within which signal discrimination can take place shifts towards significantly higher fidelity.

**Figure S4:** Equivalent to S3, but for  $f_s$ . In this case, the baseline does not shift significantly for different values of  $\beta$  and  $\gamma$ ; however, the maximal limit of  $f_s$  increases with  $d_R$  similarly to  $f_a$ .

**Figure S5:** Bifurcation analysis of the LuxR-positive feedback loop and LuxR-LuxI-double positive feedback loop mediated by quorum sensing.

(A) A positive feedback loop under the control of an AHL signal  $A$ . The transcription factor  $R$  (*i.e.*, LuxR), upon binding with the signal molecule  $A$ , forms an activated complex  $R^*$ , which is able to form a homodimer and bind to the promoter  $P_{luxI}$  (with a cooperative binding coefficient

(Hill coefficient)  $n$  that is larger than 1) to activate the gene expression of  $R$  itself, closing the autoregulatory PFL.

**(B)** Phase diagram in the parameter plane-  $(a_R, b_R)$ . The loci of Hysteresis separate the parameter space into two regions, each corresponding to a monotonic or bistable response ( $R$  vs  $A$ ), as illustrated for different  $a_R$  values (insets). In the bistable switch (“ $R$  versus  $A$ ” curve, upper inset), stable steady states are denoted by the solid line, unstable steady states by the dashed line.

**(C)** Quorum-sensing mediated double PFLs. Transcription factor  $R$  (*i.e.*, LuxR), upon binding with a signal molecule of  $A$ , forms an activated complex  $R^*$ , which is able to form a homodimer and bind to the promoter  $P_{luxI}$  (with a cooperative binding coefficient (Hill coefficient)  $n$  that is larger than 1) to activate the gene expression of  $R$  and  $I$  (and thus  $A$ ) themselves, closing the autoregulatory PFLs.

**(D)** Phase diagram in the parameter plane-  $(a_A, b_R)$ . Insets illustrate the two types of bifurcation diagrams (“ $R$  versus  $a_R$ ” curves) at different parameter regions separated by the loci of Hysteresis in the  $(a_A, b_R)$ -plane.
