# Supplementary material
Source: PubMed Central journal article supplement (PMC2573026)
Supplement: NIHMS72859-supplement-03.pdf [file NIHMS72859-supplement-03.pdf]

# Analysis of quorum sensing signal discrimination

Cameron Smith

07-09-2007

```
Clear["Global`*"]  
Off[General::spell, General::spell1]
```

The system of differential equations describing the kinetic proofreading in quorum sensing signal discrimination model are entered below:

```
QSSF = {R'[t] == kr + k1r * γ * R1[t] - k1 * A1 * R[t] - dr * R[t],  
        R1'[t] == k1 * A1 * R[t] + 2 * k2r * β * D1[t] - k1r * γ * R1[t] - α1 * dr * R1[t] -  
        2 * k2 * R1[t]2,  
        D1'[t] == k2 * R1[t]2 - k2r * β * D1[t] - α2 * dr * D1[t]  
};  
TableForm[QSSF]
```

```
R'[t] == -R[t] dr - R[t] A1 k1 + kr + γ R1[t] k1r  
R1'[t] == R[t] A1 k1 - 2 R1[t]2 k2 - γ R1[t] k1r + 2 β D1[t] k2r - R1[t] dr α1  
D1'[t] == R1[t]2 k2 - β D1[t] k2r - D1[t] dr α2
```

A base parameter set is defined (see table S1 for an explanation of each parameter value)

```
baseparam = {kr -> 20, k1 -> .1, k1r -> 1, k2 -> .1, k2r -> 1, dr1 -> .023,  
             β -> 1, α1 -> 1, α2 -> 1, γ -> 1, A1 -> 100, A2 -> 100}
```

```
{kr -> 20, k1 -> 0.1, k1r -> 1, k2 -> 0.1, k2r -> 1,  
 dr1 -> 0.023, β -> 1, α1 -> 1, α2 -> 1, γ -> 1, A1 -> 100, A2 -> 100}
```

Solve the system at steady state

**QSSFixedPoints =**

**Simplify[Solve[{QSSF[[1, 2]] == 0, QSSF[[2, 2]] == 0, QSSF[[3, 2]] == 0},  
{R[t], R1[t], D1[t]}]]**

$\left\{ \left\{ R[t] \rightarrow \right. \right.$

$$-\frac{1}{4 d_r (d_r + A_1 k_1)^2 k_2 \alpha_2} \left( \beta \gamma^2 d_r k_{1r}^2 k_{2r} + \beta \gamma d_r^2 k_{1r} k_{2r} \alpha_1 + \beta \gamma A_1 d_r k_1 k_{1r} k_{2r} \alpha_1 - \right. \\ \left. 4 d_r^2 k_2 k_r \alpha_2 - 4 A_1 d_r k_1 k_2 k_r \alpha_2 + \gamma^2 d_r^2 k_{1r}^2 \alpha_2 + \gamma d_r^3 k_{1r} \alpha_1 \alpha_2 + \right. \\ \left. \gamma A_1 d_r^2 k_1 k_{1r} \alpha_1 \alpha_2 + \gamma k_{1r} \sqrt{\left( d_r (\beta k_{2r} + d_r \alpha_2) \left( 8 A_1 k_1 (d_r + A_1 k_1) k_2 k_r \alpha_2 + \right. \right. \right.} \\ \left. \left. \left. d_r (\gamma k_{1r} + (d_r + A_1 k_1) \alpha_1)^2 (\beta k_{2r} + d_r \alpha_2) \right) \right) \right),$$

$$D1[t] \rightarrow \frac{1}{8 d_r (d_r + A_1 k_1)^2 k_2 \alpha_2^2} \left( \beta \gamma^2 d_r k_{1r}^2 k_{2r} + 2 \beta \gamma d_r^2 k_{1r} k_{2r} \alpha_1 + \right. \\ \left. 2 \beta \gamma A_1 d_r k_1 k_{1r} k_{2r} \alpha_1 + \beta d_r^3 k_{2r} \alpha_1^2 + 2 \beta A_1 d_r^2 k_1 k_{2r} \alpha_1^2 + \right. \\ \left. \beta A_1^2 d_r k_1^2 k_{2r} \alpha_1^2 + 4 A_1 d_r k_1 k_2 k_r \alpha_2 + 4 A_1^2 k_1^2 k_2 k_r \alpha_2 + \gamma^2 d_r^2 k_{1r}^2 \alpha_2 + \right. \\ \left. 2 \gamma d_r^3 k_{1r} \alpha_1 \alpha_2 + 2 \gamma A_1 d_r^2 k_1 k_{1r} \alpha_1 \alpha_2 + d_r^4 \alpha_1^2 \alpha_2 + 2 A_1 d_r^3 k_1 \alpha_1^2 \alpha_2 + \right. \\ \left. A_1^2 d_r^2 k_1^2 \alpha_1^2 \alpha_2 + \gamma k_{1r} \sqrt{\left( d_r (\beta k_{2r} + d_r \alpha_2) \left( 8 A_1 k_1 (d_r + A_1 k_1) k_2 k_r \alpha_2 + \right. \right. \right.} \\ \left. \left. \left. d_r (\gamma k_{1r} + (d_r + A_1 k_1) \alpha_1)^2 (\beta k_{2r} + d_r \alpha_2) \right) \right) \right) + \\ d_r \alpha_1 \sqrt{\left( d_r (\beta k_{2r} + d_r \alpha_2) \left( 8 A_1 k_1 (d_r + A_1 k_1) k_2 k_r \alpha_2 + \right. \right. \right.} \\ \left. \left. \left. d_r (\gamma k_{1r} + (d_r + A_1 k_1) \alpha_1)^2 (\beta k_{2r} + d_r \alpha_2) \right) \right) \right) + \\ A_1 k_1 \alpha_1 \sqrt{\left( d_r (\beta k_{2r} + d_r \alpha_2) \left( 8 A_1 k_1 (d_r + A_1 k_1) k_2 k_r \alpha_2 + \right. \right. \right.} \\ \left. \left. \left. d_r (\gamma k_{1r} + (d_r + A_1 k_1) \alpha_1)^2 (\beta k_{2r} + d_r \alpha_2) \right) \right) \right), \\ R1[t] \rightarrow - \left( \beta \gamma d_r k_{1r} k_{2r} + \beta d_r^2 k_{2r} \alpha_1 + \beta A_1 d_r k_1 k_{2r} \alpha_1 + \gamma d_r^2 k_{1r} \alpha_2 + d_r^3 \alpha_1 \alpha_2 + \right. \\ \left. A_1 d_r^2 k_1 \alpha_1 \alpha_2 + \sqrt{\left( d_r (\beta k_{2r} + d_r \alpha_2) \left( 8 A_1 k_1 (d_r + A_1 k_1) k_2 k_r \alpha_2 + d_r \right. \right. \right.} \\ \left. \left. \left. (\gamma k_{1r} + (d_r + A_1 k_1) \alpha_1)^2 (\beta k_{2r} + d_r \alpha_2) \right) \right) \right) \right) / (4 d_r (d_r + A_1 k_1) k_2 \alpha_2) \left. \right\},$$

$$\left\{ R[t] \rightarrow - \frac{1}{4 d_r (d_r + A_1 k_1)^2 k_2 \alpha_2} \left( \beta \gamma^2 d_r k_{1r}^2 k_{2r} + \beta \gamma d_r^2 k_{1r} k_{2r} \alpha_1 + \right. \right. \\ \left. \beta \gamma A_1 d_r k_1 k_{1r} k_{2r} \alpha_1 - 4 d_r^2 k_2 k_r \alpha_2 - 4 A_1 d_r k_1 k_2 k_r \alpha_2 + \right. \\ \left. \gamma^2 d_r^2 k_{1r}^2 \alpha_2 + \gamma d_r^3 k_{1r} \alpha_1 \alpha_2 + \gamma A_1 d_r^2 k_1 k_{1r} \alpha_1 \alpha_2 - \right. \\ \left. \gamma k_{1r} \sqrt{\left( d_r (\beta k_{2r} + d_r \alpha_2) \left( 8 A_1 k_1 (d_r + A_1 k_1) k_2 k_r \alpha_2 + \right. \right. \right.} \\ \left. \left. \left. d_r (\gamma k_{1r} + (d_r + A_1 k_1) \alpha_1)^2 (\beta k_{2r} + d_r \alpha_2) \right) \right) \right) \right),$$

$$D1[t] \rightarrow \frac{1}{8 d_r (d_r + A_1 k_1)^2 k_2 \alpha_2^2} \left( \beta \gamma^2 d_r k_{1r}^2 k_{2r} + 2 \beta \gamma d_r^2 k_{1r} k_{2r} \alpha_1 + \right. \\ \left. 2 \beta \gamma A_1 d_r k_1 k_{1r} k_{2r} \alpha_1 + \beta d_r^3 k_{2r} \alpha_1^2 + 2 \beta A_1 d_r^2 k_1 k_{2r} \alpha_1^2 + \right. \\ \left. \beta A_1^2 d_r k_1^2 k_{2r} \alpha_1^2 + 4 A_1 d_r k_1 k_2 k_r \alpha_2 + 4 A_1^2 k_1^2 k_2 k_r \alpha_2 + \gamma^2 d_r^2 k_{1r}^2 \alpha_2 + \right. \\ \left. 2 \gamma d_r^3 k_{1r} \alpha_1 \alpha_2 + 2 \gamma A_1 d_r^2 k_1 k_{1r} \alpha_1 \alpha_2 + d_r^4 \alpha_1^2 \alpha_2 + 2 A_1 d_r^3 k_1 \alpha_1^2 \alpha_2 + \right. \\ \left. A_1^2 d_r^2 k_1^2 \alpha_1^2 \alpha_2 - \gamma k_{1r} \sqrt{\left( d_r (\beta k_{2r} + d_r \alpha_2) \left( 8 A_1 k_1 (d_r + A_1 k_1) k_2 k_r \alpha_2 + \right. \right. \right.} \\ \left. \left. \left. d_r (\gamma k_{1r} + (d_r + A_1 k_1) \alpha_1)^2 (\beta k_{2r} + d_r \alpha_2) \right) \right) \right) \right) -$$

$$\begin{aligned}
 & d_r \alpha_1 \sqrt{ \left( d_r (\beta k_{2r} + d_r \alpha_2) \left( 8 A_1 k_1 (d_r + A_1 k_1) k_2 k_r \alpha_2 + \right. \right. \\
 & \quad \left. \left. d_r (\gamma k_{1r} + (d_r + A_1 k_1) \alpha_1)^2 (\beta k_{2r} + d_r \alpha_2) \right) \right) - } \\
 & A_1 k_1 \alpha_1 \sqrt{ \left( d_r (\beta k_{2r} + d_r \alpha_2) \left( 8 A_1 k_1 (d_r + A_1 k_1) k_2 k_r \alpha_2 + \right. \right. \\
 & \quad \left. \left. d_r (\gamma k_{1r} + (d_r + A_1 k_1) \alpha_1)^2 (\beta k_{2r} + d_r \alpha_2) \right) \right) } , \\
 R1[t] \rightarrow & - \left( \beta \gamma d_r k_{1r} k_{2r} + \beta d_r^2 k_{2r} \alpha_1 + \beta A_1 d_r k_1 k_{2r} \alpha_1 + \gamma d_r^2 k_{1r} \alpha_2 + d_r^3 \alpha_1 \alpha_2 + \right. \\
 & \left. A_1 d_r^2 k_1 \alpha_1 \alpha_2 - \sqrt{ \left( d_r (\beta k_{2r} + d_r \alpha_2) \left( 8 A_1 k_1 (d_r + A_1 k_1) k_2 k_r \alpha_2 + d_r \right. \right. \right. \\
 & \quad \left. \left. \left. (\gamma k_{1r} + (d_r + A_1 k_1) \alpha_1)^2 (\beta k_{2r} + d_r \alpha_2) \right) \right) \right) } / (4 d_r (d_r + A_1 k_1) k_2 \alpha_2) \} \}
 \end{aligned}$$

Check the fixed points for the base parameter values to determine which solution provides the biologically relevant one (i.e. product concentrations are not less than 0)

```

QSSFFixedPoints[[1, 1, 2]] /. baseparam /. d_r -> 10
QSSFFixedPoints[[2, 1, 2]] /. baseparam /. d_r -> 10
QSSFFixedPoints[[1, 2, 2]] /. baseparam /. d_r -> 10
QSSFFixedPoints[[2, 2, 2]] /. baseparam /. d_r -> 10
QSSFFixedPoints[[1, 3, 2]] /. baseparam /. d_r -> 10
QSSFFixedPoints[[2, 3, 2]] /. baseparam /. d_r -> 10

```

-1.93436

1.04686

31.3108

0.00798447

-58.6872

0.937172

Introduce the dissociation constant,  $K=k_{1r}/k_{-1}=k_{2r}/k_{-2}$  and then allow  $k_1, k_{1r}, k_2,$  and  $k_{2r}$  to approach infinity as a mathematical representation of infinitely fast binding kinetics, note that this procedure only requires taking the limits as  $k_1$  and  $k_2$  approach infinity following substitution for  $k_{1r}$

```

fastbindR = QSSFFixedPoints[[2, 1, 2]] /. {k1r → (K k1), k2r → (K k2)};
fastbindR1 = QSSFFixedPoints[[2, 3, 2]] /. {k1r → (K k1), k2r → (K k2)};
fastbindD1 = QSSFFixedPoints[[2, 2, 2]] /. {k1r → (K k1), k2r → (K k2)};
Limit[Limit[fastbindR, k2 → Infinity], k1 → Infinity]
Limit[Limit[fastbindR1, k2 → Infinity], k1 → Infinity]
Limit[Limit[fastbindD1, k2 → Infinity], k1 → Infinity]

```

$$\frac{K \gamma \left( K \beta d_r (K \gamma + A_1 \alpha_1) - \sqrt{K \beta d_r \left( K \beta d_r (K \gamma + A_1 \alpha_1)^2 + 8 A_1^2 k_r \alpha_2 \right)} \right)}{4 A_1^2 d_r \alpha_2}$$

$$\frac{-K \beta d_r (K \gamma + A_1 \alpha_1) + \sqrt{K \beta d_r \left( K \beta d_r (K \gamma + A_1 \alpha_1)^2 + 8 A_1^2 k_r \alpha_2 \right)}}{4 A_1 d_r \alpha_2}$$

$$\frac{1}{8 A_1^2 d_r \alpha_2^2} \left( K \beta d_r (K \gamma + A_1 \alpha_1)^2 + 4 A_1^2 k_r \alpha_2 - K \gamma \sqrt{K \beta d_r \left( K \beta d_r (K \gamma + A_1 \alpha_1)^2 + 8 A_1^2 k_r \alpha_2 \right)} - A_1 \alpha_1 \sqrt{K \beta d_r \left( K \beta d_r (K \gamma + A_1 \alpha_1)^2 + 8 A_1^2 k_r \alpha_2 \right)} \right)$$

Compute the steady-state concentrations of D1 and D2 and then take their ratio to determine f

```

symbD1 =
  Simplify[QSSFFixedPoints[[2, 2, 2]] /.
    {α1 → dr1 / dr, α2 → dr1 / dr, β → 1, γ → 1}]
symbD2 = Simplify[QSSFFixedPoints[[2, 2, 2]] /. A1 → A2]
symbf = Simplify[symbD1 / symbD2]

```

$$\begin{aligned}
 & \frac{1}{8 d_{r_1}^2 (d_r + A_1 k_1)^2 k_2} \\
 & d_r \left( d_r d_{r_1}^3 + 2 A_1 d_{r_1}^3 k_1 + \frac{A_1^2 d_{r_1}^3 k_1^2}{d_r} + 4 A_1 d_{r_1} k_1 k_2 k_r + \frac{4 A_1^2 d_{r_1} k_1^2 k_2 k_r}{d_r} + 2 d_r d_{r_1}^2 k_{1r} + \right. \\
 & 2 A_1 d_{r_1}^2 k_1 k_{1r} + d_r d_{r_1} k_{1r}^2 + d_r d_{r_1}^2 k_{2r} + 2 A_1 d_{r_1}^2 k_1 k_{2r} + \frac{A_1^2 d_{r_1}^2 k_1^2 k_{2r}}{d_r} + \\
 & \left. 2 d_r d_{r_1} k_{1r} k_{2r} + 2 A_1 d_{r_1} k_1 k_{1r} k_{2r} + d_r k_{1r}^2 k_{2r} - d_{r_1} \sqrt{\left( d_r (d_{r_1} + k_{2r}) \right. \right. \\
 & \left. \left. \left( \frac{8 A_1 d_{r_1} k_1 (d_r + A_1 k_1) k_2 k_r}{d_r} + d_r \left( d_{r_1} \left( 1 + \frac{A_1 k_1}{d_r} \right) + k_{1r} \right)^2 (d_{r_1} + k_{2r}) \right) \right) \right) - \\
 & \frac{1}{d_r} A_1 d_{r_1} k_1 \sqrt{\left( d_r (d_{r_1} + k_{2r}) \left( \frac{8 A_1 d_{r_1} k_1 (d_r + A_1 k_1) k_2 k_r}{d_r} + \right. \right. \\
 & \left. \left. d_r \left( d_{r_1} \left( 1 + \frac{A_1 k_1}{d_r} \right) + k_{1r} \right)^2 (d_{r_1} + k_{2r}) \right) \right) - k_{1r} \sqrt{\left( d_r (d_{r_1} + k_{2r}) \right.} \\
 & \left. \left. \left( \frac{8 A_1 d_{r_1} k_1 (d_r + A_1 k_1) k_2 k_r}{d_r} + d_r \left( d_{r_1} \left( 1 + \frac{A_1 k_1}{d_r} \right) + k_{1r} \right)^2 (d_{r_1} + k_{2r}) \right) \right) \right) \right)
 \end{aligned}$$

$$\begin{aligned}
 & \frac{1}{8 d_r (d_r + A_2 k_1)^2 k_2 \alpha_2^2} \\
 & \left( \beta \gamma^2 d_r k_{1r}^2 k_{2r} + 2 \beta \gamma d_r^2 k_{1r} k_{2r} \alpha_1 + 2 \beta \gamma A_2 d_r k_1 k_{1r} k_{2r} \alpha_1 + \beta d_r^3 k_{2r} \alpha_1^2 + \right. \\
 & 2 \beta A_2 d_r^2 k_1 k_{2r} \alpha_1^2 + \beta A_2^2 d_r k_1^2 k_{2r} \alpha_1^2 + 4 A_2 d_r k_1 k_2 k_r \alpha_2 + \\
 & 4 A_2^2 k_1^2 k_2 k_r \alpha_2 + \gamma^2 d_r^2 k_{1r}^2 \alpha_2 + 2 \gamma d_r^3 k_{1r} \alpha_1 \alpha_2 + 2 \gamma A_2 d_r^2 k_1 k_{1r} \alpha_1 \alpha_2 + \\
 & d_r^4 \alpha_1^2 \alpha_2 + 2 A_2 d_r^3 k_1 \alpha_1^2 \alpha_2 + A_2^2 d_r^2 k_1^2 \alpha_1^2 \alpha_2 - \gamma k_{1r} \sqrt{\left( d_r (\beta k_{2r} + d_r \alpha_2) \right.} \\
 & \left. \left( 8 A_2 k_1 (d_r + A_2 k_1) k_2 k_r \alpha_2 + d_r (\gamma k_{1r} + (d_r + A_2 k_1) \alpha_1)^2 (\beta k_{2r} + d_r \alpha_2) \right) \right) - \\
 & d_r \alpha_1 \sqrt{\left( d_r (\beta k_{2r} + d_r \alpha_2) \left( 8 A_2 k_1 (d_r + A_2 k_1) k_2 k_r \alpha_2 + \right. \right. \\
 & \left. \left. d_r (\gamma k_{1r} + (d_r + A_2 k_1) \alpha_1)^2 (\beta k_{2r} + d_r \alpha_2) \right) \right) - A_2 k_1 \alpha_1 \sqrt{\left( d_r (\beta k_{2r} + d_r \alpha_2) \right.} \\
 & \left. \left. \left( 8 A_2 k_1 (d_r + A_2 k_1) k_2 k_r \alpha_2 + d_r (\gamma k_{1r} + (d_r + A_2 k_1) \alpha_1)^2 (\beta k_{2r} + d_r \alpha_2) \right) \right) \right)
 \end{aligned}$$

$$\begin{aligned}
& \left( d_r^2 (d_r + A_2 k_1)^2 \right. \\
& \left( d_r d_{r_1}^3 + 2 A_1 d_{r_1}^3 k_1 + \frac{A_1^2 d_{r_1}^3 k_1^2}{d_r} + 4 A_1 d_{r_1} k_1 k_2 k_r + \frac{4 A_1^2 d_{r_1} k_1^2 k_2 k_r}{d_r} + 2 d_r d_{r_1}^2 k_{1r} + \right. \\
& 2 A_1 d_{r_1}^2 k_1 k_{1r} + d_r d_{r_1} k_{1r}^2 + d_r d_{r_1}^2 k_{2r} + 2 A_1 d_{r_1}^2 k_1 k_{2r} + \frac{A_1^2 d_{r_1}^2 k_1^2 k_{2r}}{d_r} + \\
& 2 d_r d_{r_1} k_{1r} k_{2r} + 2 A_1 d_{r_1} k_1 k_{1r} k_{2r} + d_r k_{1r}^2 k_{2r} - d_{r_1} \sqrt{\left( d_r (d_{r_1} + k_{2r}) \right. \\
& \left. \left( \frac{8 A_1 d_{r_1} k_1 (d_r + A_1 k_1) k_2 k_r}{d_r} + d_r \left( d_{r_1} \left( 1 + \frac{A_1 k_1}{d_r} \right) + k_{1r} \right)^2 (d_{r_1} + k_{2r}) \right) \right)} - \\
& \frac{1}{d_r} A_1 d_{r_1} k_1 \sqrt{\left( d_r (d_{r_1} + k_{2r}) \left( \frac{8 A_1 d_{r_1} k_1 (d_r + A_1 k_1) k_2 k_r}{d_r} + \right. \right. \\
& \left. \left. d_r \left( d_{r_1} \left( 1 + \frac{A_1 k_1}{d_r} \right) + k_{1r} \right)^2 (d_{r_1} + k_{2r}) \right) \right)} - k_{1r} \sqrt{\left( d_r (d_{r_1} + k_{2r}) \right. \\
& \left. \left( \frac{8 A_1 d_{r_1} k_1 (d_r + A_1 k_1) k_2 k_r}{d_r} + d_r \left( d_{r_1} \left( 1 + \frac{A_1 k_1}{d_r} \right) + k_{1r} \right)^2 (d_{r_1} + k_{2r}) \right) \right) \right) \\
& \left. \alpha_2^2 \right) / \left( d_{r_1}^2 (d_r + A_1 k_1)^2 (\beta \gamma^2 d_r k_{1r}^2 k_{2r} + 2 \beta \gamma d_r^2 k_{1r} k_{2r} \alpha_1 + \right. \\
& 2 \beta \gamma A_2 d_r k_1 k_{1r} k_{2r} \alpha_1 + \beta d_r^3 k_{2r} \alpha_1^2 + 2 \beta A_2 d_r^2 k_1 k_{2r} \alpha_1^2 + \\
& \beta A_2^2 d_r k_1^2 k_{2r} \alpha_1^2 + 4 A_2 d_r k_1 k_2 k_r \alpha_2 + 4 A_2^2 k_1^2 k_2 k_r \alpha_2 + \\
& \gamma^2 d_r^2 k_{1r}^2 \alpha_2 + 2 \gamma d_r^3 k_{1r} \alpha_1 \alpha_2 + 2 \gamma A_2 d_r^2 k_1 k_{1r} \alpha_1 \alpha_2 + d_r^4 \alpha_1^2 \alpha_2 + \\
& 2 A_2 d_r^3 k_1 \alpha_1^2 \alpha_2 + A_2^2 d_r^2 k_1^2 \alpha_1^2 \alpha_2 - \gamma k_{1r} \sqrt{\left( d_r (\beta k_{2r} + d_r \alpha_2) \right. \\
& \left. \left( 8 A_2 k_1 (d_r + A_2 k_1) k_2 k_r \alpha_2 + d_r (\gamma k_{1r} + (d_r + A_2 k_1) \alpha_1)^2 (\beta k_{2r} + d_r \alpha_2) \right) \right)} - \\
& d_r \alpha_1 \sqrt{\left( d_r (\beta k_{2r} + d_r \alpha_2) \left( 8 A_2 k_1 (d_r + A_2 k_1) k_2 k_r \alpha_2 + d_r \right. \right. \\
& \left. \left. (\gamma k_{1r} + (d_r + A_2 k_1) \alpha_1)^2 (\beta k_{2r} + d_r \alpha_2) \right) \right)} - A_2 k_1 \alpha_1 \sqrt{\left( d_r (\beta k_{2r} + d_r \alpha_2) \right. \\
& \left. \left( 8 A_2 k_1 (d_r + A_2 k_1) k_2 k_r \alpha_2 + d_r (\gamma k_{1r} + (d_r + A_2 k_1) \alpha_1)^2 (\beta k_{2r} + d_r \alpha_2) \right) \right) \right) \right)
\end{aligned}$$

Check once again that biologically relevant solutions have been achieved (i.e. concentrations not less than 0)

```

sympD1 /. baseparam /. dr → 10
sympD2 /. baseparam /. dr → 0.2

```

```
27.3195
```

```
37.3902
```

The expression denoted as  $f$  in equation (5) is determined, the additional assumptions are:

- 1) binding kinetics much faster than protein dynamics
- 2) Signal concentrations are equivalent ( $A = A_1 = A_2$ )

```

dissof = sympf /. {k1r → (K k1), k2r → (K k2), A2 → A, A1 → A};
fastbindf = Simplify[Limit[Limit[dissof, k2 → Infinity], k1 → Infinity]]

```

$$\left( d_r \left( K^3 d_r^2 + K d_r \left( 2 A K d_{r1} - \sqrt{K \left( K^3 d_r^2 + 2 A K^2 d_r d_{r1} + A^2 d_{r1} (K d_{r1} + 8 k_r) \right)} \right) \right) + \right. \\ \left. A d_{r1} \left( A K d_{r1} + 4 A k_r - \sqrt{K \left( K^3 d_r^2 + 2 A K^2 d_r d_{r1} + A^2 d_{r1} (K d_{r1} + 8 k_r) \right)} \right) \right) \alpha_2^2 \Bigg/ \\ \left( d_{r1}^2 \left( K \beta d_r (K \gamma + A \alpha_1)^2 + 4 A^2 k_r \alpha_2 - (K \gamma + A \alpha_1) \right. \right. \\ \left. \left. \sqrt{K \beta d_r (K \beta d_r (K \gamma + A \alpha_1)^2 + 8 A^2 k_r \alpha_2)} \right) \right)$$

The maximum achievable limit of  $f$  occurs when  $\alpha_1 = \alpha_2 = 1$

```

fmax = FullSimplify[fastbindf /. {α1 → 1, α2 → 1}]

```

$$- \left( d_r \left( K^3 d_r^2 + K d_r \left( 2 A K d_{r1} - \sqrt{K \left( K \left( K d_r + A d_{r1} \right)^2 + 8 A^2 d_{r1} k_r} \right)} \right) \right) + \right. \\ \left. A d_{r1} \left( A K d_{r1} + 4 A k_r - \sqrt{K \left( K \left( K d_r + A d_{r1} \right)^2 + 8 A^2 d_{r1} k_r} \right)} \right) \right) \Bigg/ \\ \left( d_{r1}^2 \left( -K \beta (A + K \gamma)^2 d_r - 4 A^2 k_r + (A + K \gamma) \sqrt{K \beta d_r (K \beta (A + K \gamma)^2 d_r + 8 A^2 k_r)} \right) \right)$$

The minimum achievable limit of  $f$  occurs when  $\alpha_1 = \alpha_2 = \frac{d_{r1}}{d_r}$

```
fmin = FullSimplify[fastbindf /. {α1 → dr1 / dr, α2 → dr1 / dr}]
```

$$\left( K^3 d_r^2 + K d_r \left( 2 A K d_{r1} - \sqrt{K \left( K d_r + A d_{r1} \right)^2 + 8 A^2 d_{r1} k_r} \right) + \right. \\ \left. A d_{r1} \left( A K d_{r1} + 4 A k_r - \sqrt{K \left( K d_r + A d_{r1} \right)^2 + 8 A^2 d_{r1} k_r} \right) \right) / \\ \left( K \beta \left( K \gamma d_r + A d_{r1} \right)^2 + 4 A^2 d_{r1} k_r - \right. \\ \left. \left( K \gamma d_r + A d_{r1} \right) \sqrt{K \beta \left( K \beta \left( K \gamma d_r + A d_{r1} \right)^2 + 8 A^2 d_{r1} k_r} \right) \right)$$

Compute f for irreversible (i.e. the dissociation constant, K=0) binding kinetics

```
Limit[fastbindf, K → 0]
```

$$\frac{d_r \alpha_2}{d_{r1}}$$
