# Supplementary material
Source: PubMed Central journal article supplement (PMC2573026)

Figure S1

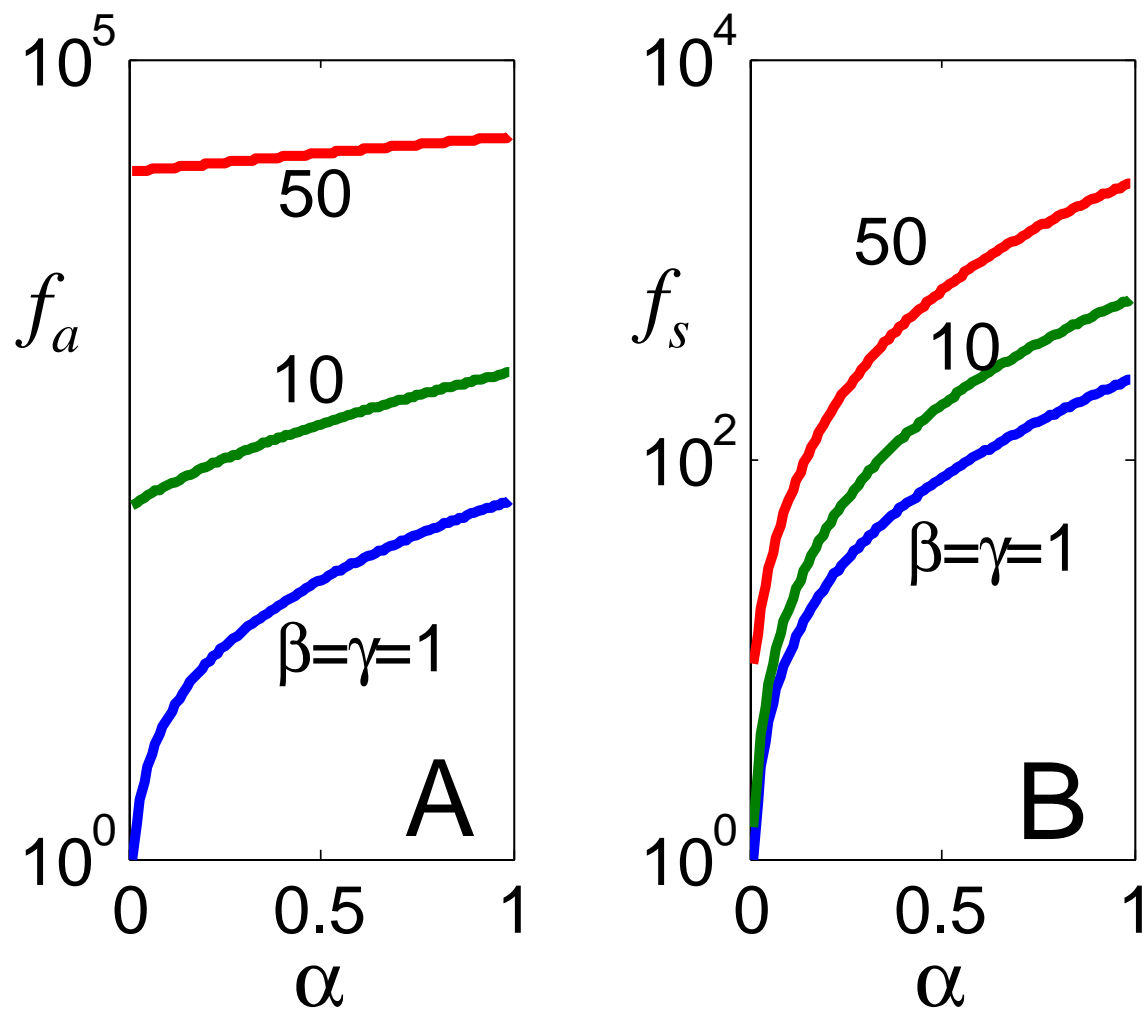

Figure S2

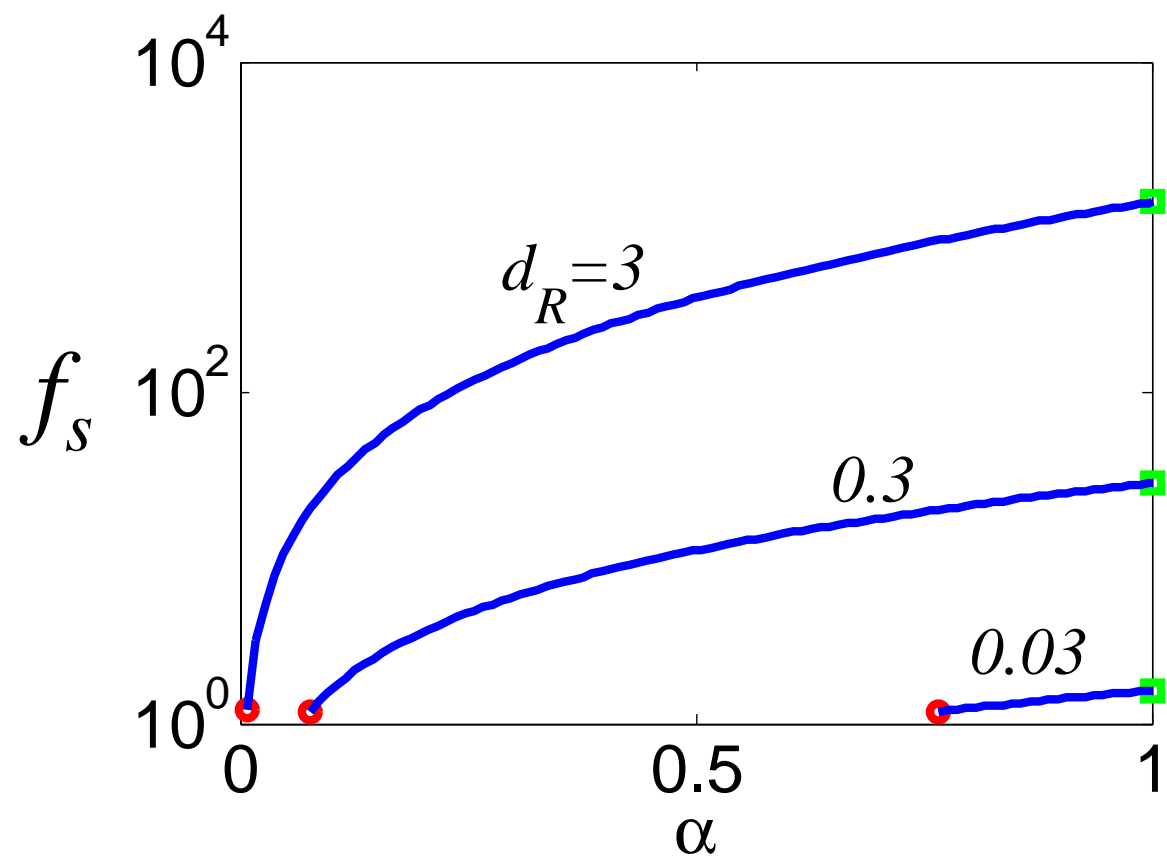

Figure S3

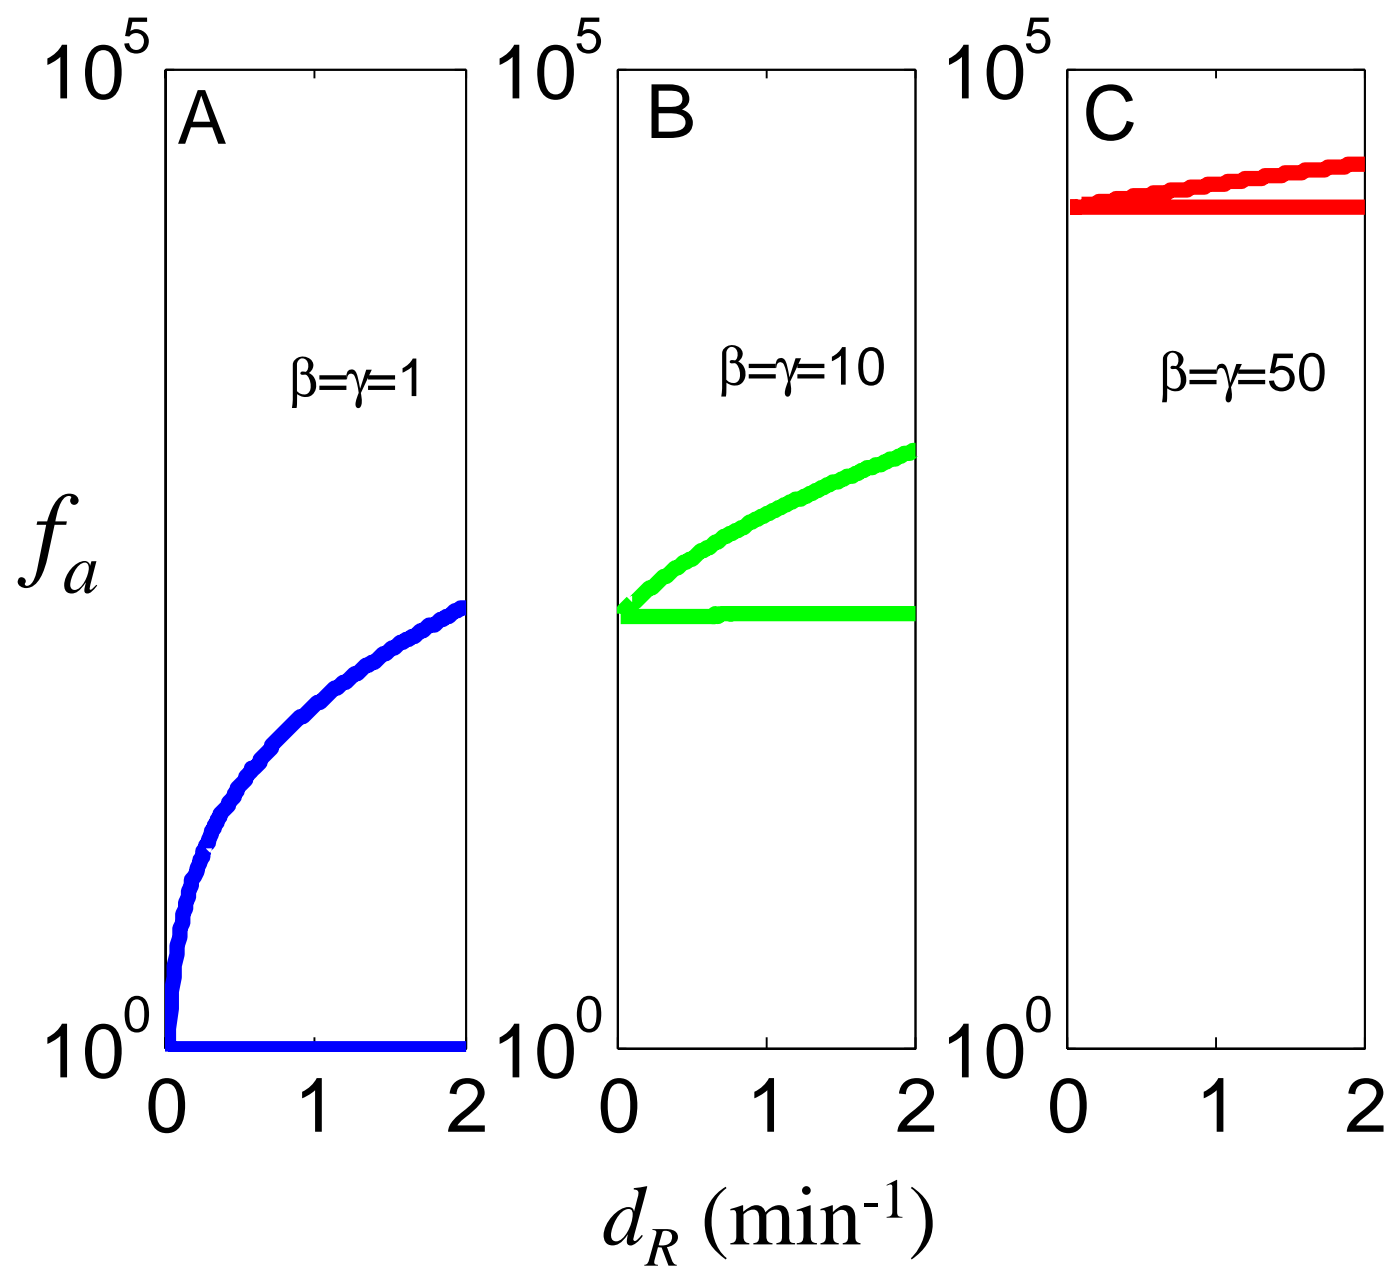

Figure S4

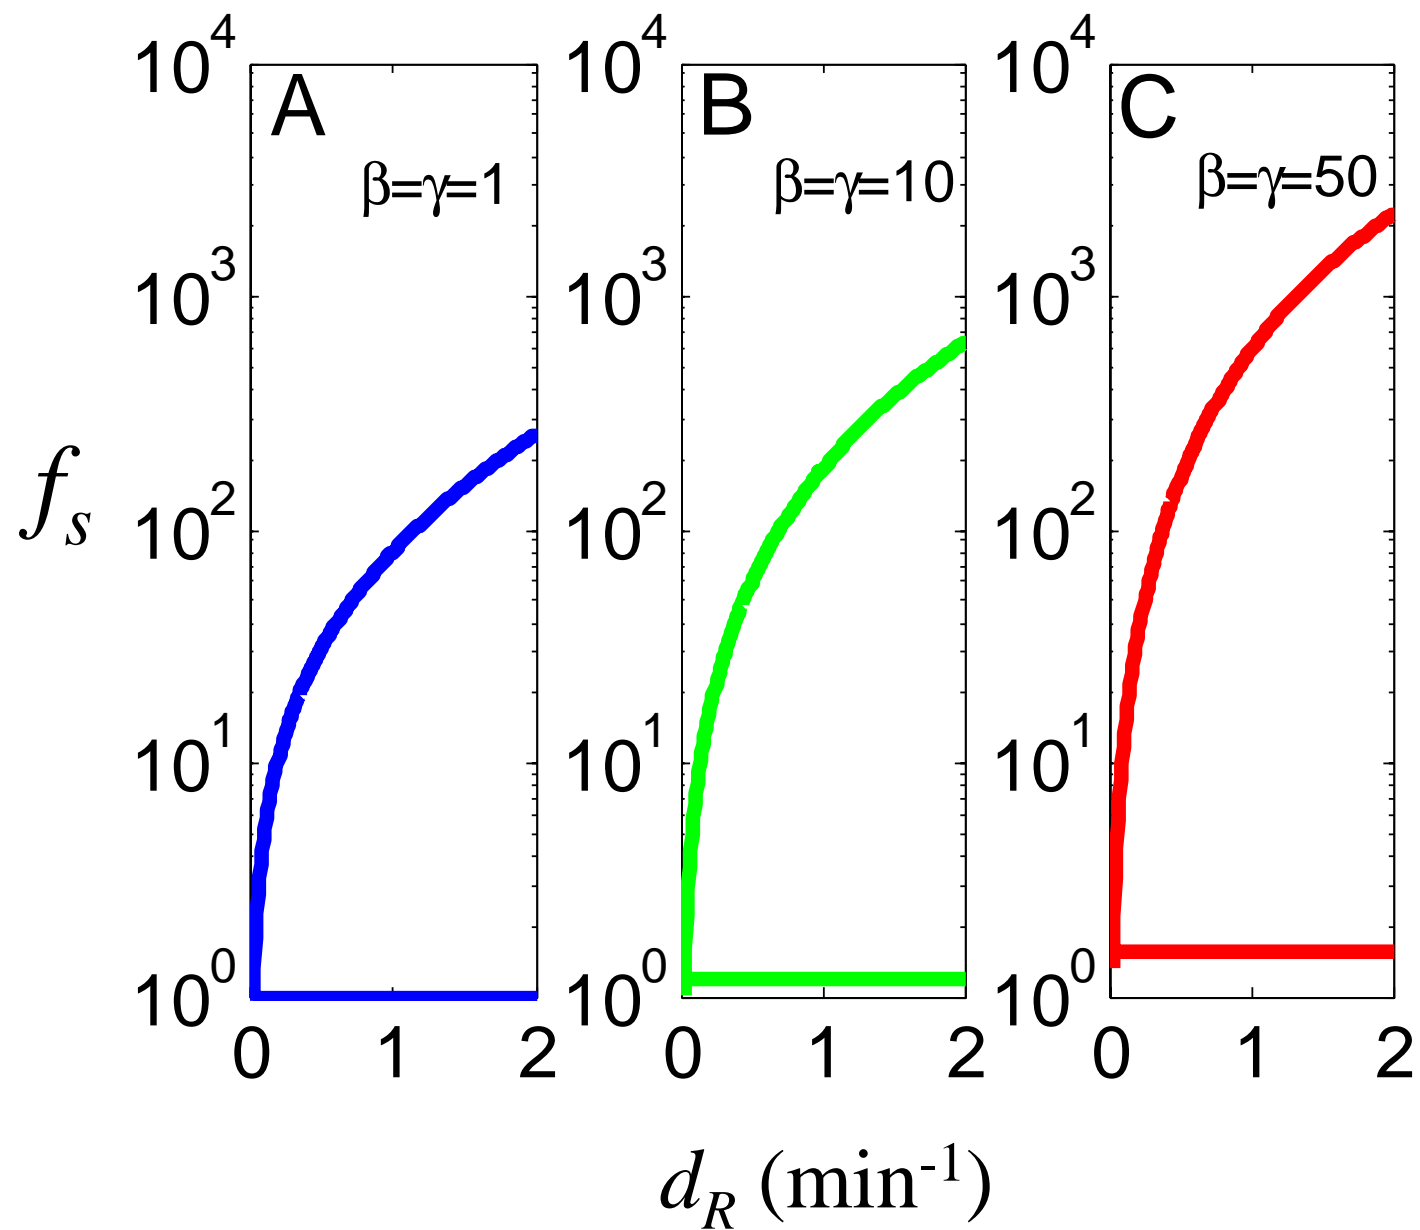

Figure S5

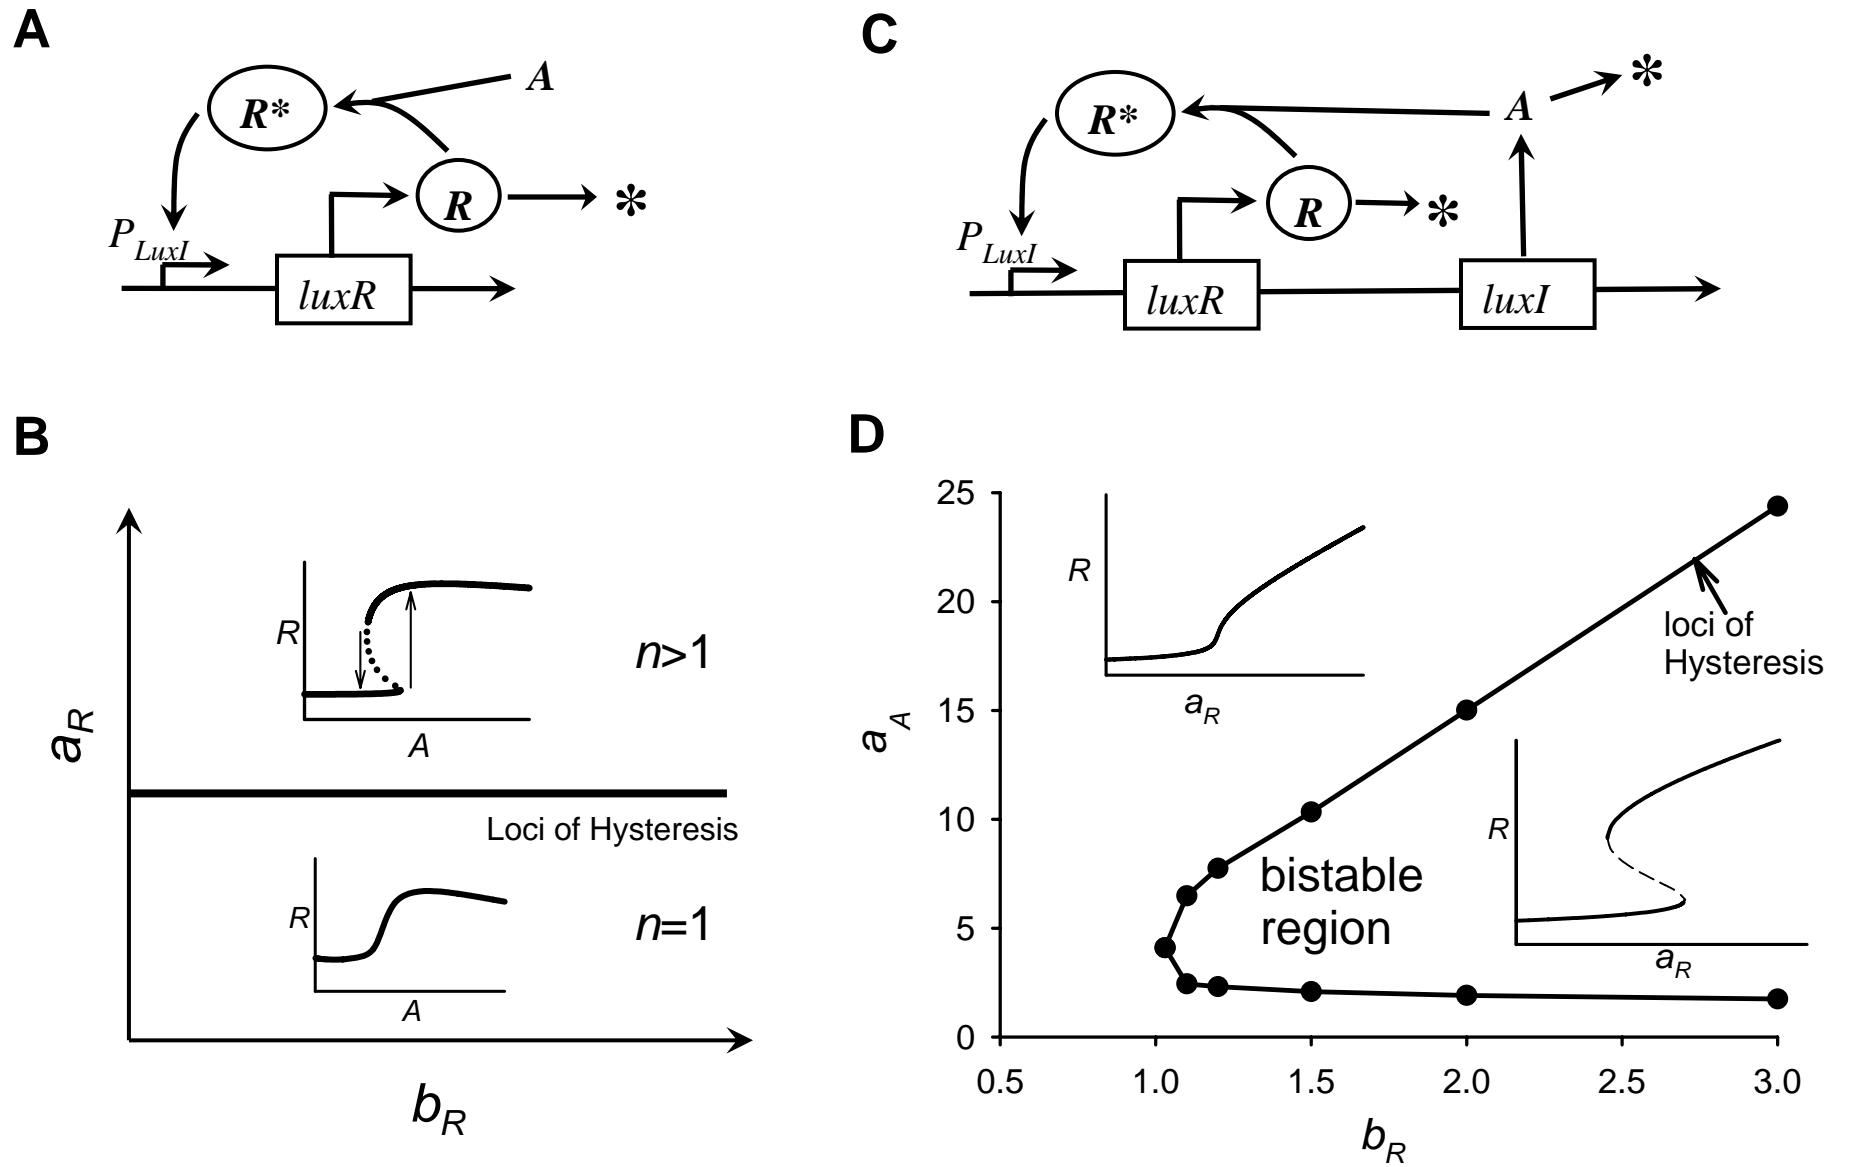

Supplement: NIHMS72859-supplement-02.pdf [file NIHMS72859-supplement-02.pdf]
